# Supplementary material for: Low paternal dietary folate alters the mouse sperm epigenome and is associated with negative pregnancy outcomes
Source: PubMed Central journal article supplement — Nat Commun. 2013 Dec 10;4:2889. doi: 10.1038/ncomms3889 (PMC3863903; doi:10.1038/ncomms3889), 2013-12-10
Supplement: ncomms3889-s1.pdf [file ncomms3889-s1.pdf]

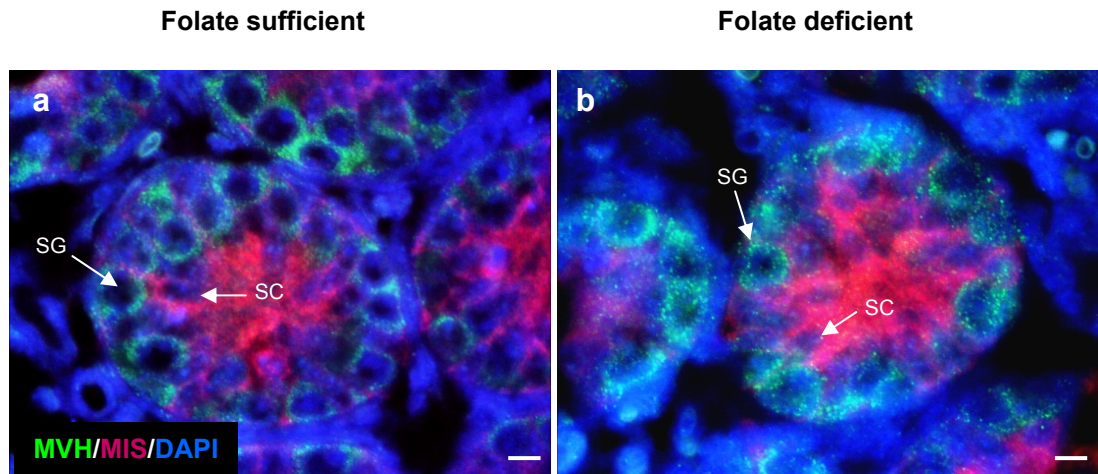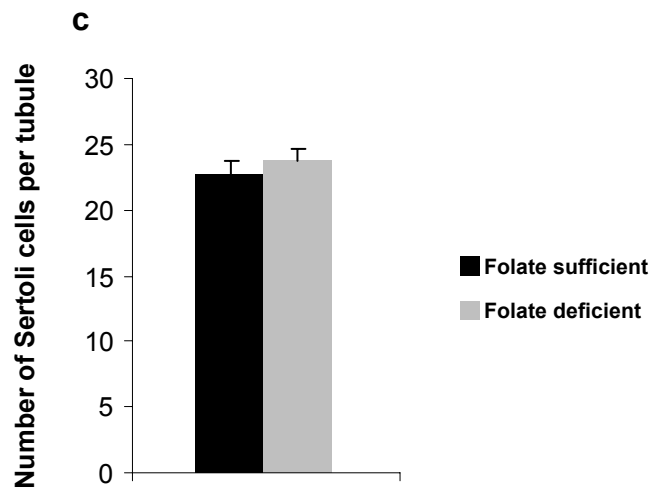

**Supplementary Figure S1. Sertoli cell development is not affected by folate deficiency.**

Post-natal day (PND) 12 testis cross sections from folate sufficient (FS) (a) and folate deficient (FD) mice (b) were co-labeled with anti-MIS (Müllerian-inhibiting substance, Sertoli cell [SC] marker, cytoplasmic, red) and anti-MVH (Mouse VASA homolog, spermatogonia [SG] marker, cytoplasmic, green) antibodies. Nuclei were stained with DAPI (blue). (c) The number of Sertoli cells present in the seminiferous tubules was the same in FS and FD testes. Means ± SEM of 3 determinations are shown. Bars represent 10µm.

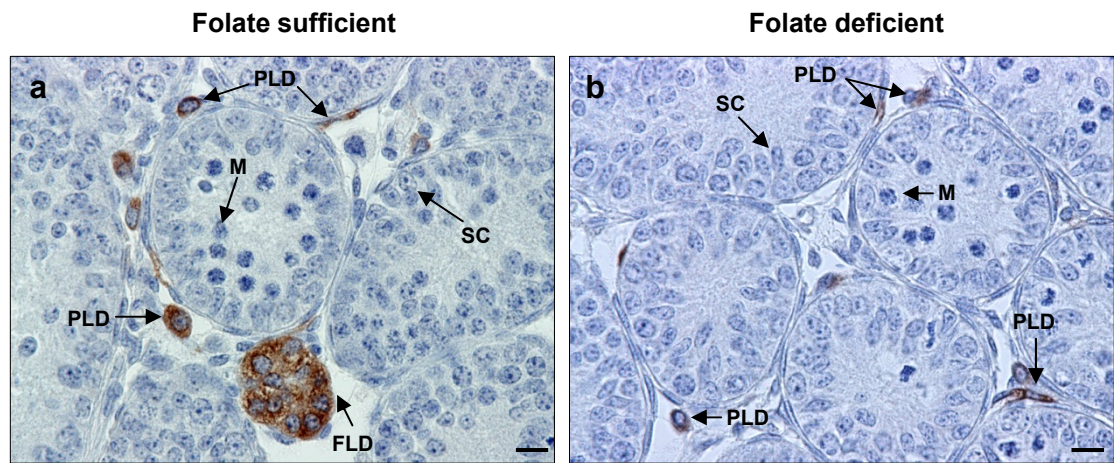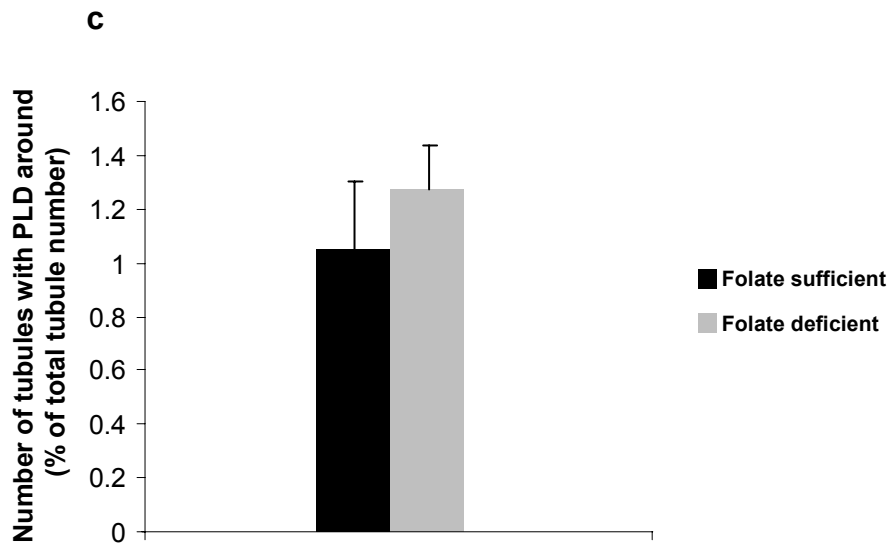

**Supplementary Figure S2. Leydig cell development is not affected by folate deficiency.**

Post-natal day (PND) 12 testis cross sections from folate sufficient (FS) (a) and folate deficient (FD) mice (b) were stained using an anti-3 $\beta$ HSD (3- $\beta$ -hydroxysteroid dehydrogenase/ $\Delta$ -5-4 isomerase) antibody which is a marker for Leydig cells. (c) The number of progenitor Leydig cells (PLD, single cells stained in Brown) present in the interstitial tissue surrounding the seminiferous tubules was the same in the FS and FD testes. Fetal Leydig cells (FLD) were also not affected. M, indicates the meiotic germ cells and SC, the Sertoli cells. Means  $\pm$  SEM of 3 determinations are shown. Bars represent 10 $\mu$ m.

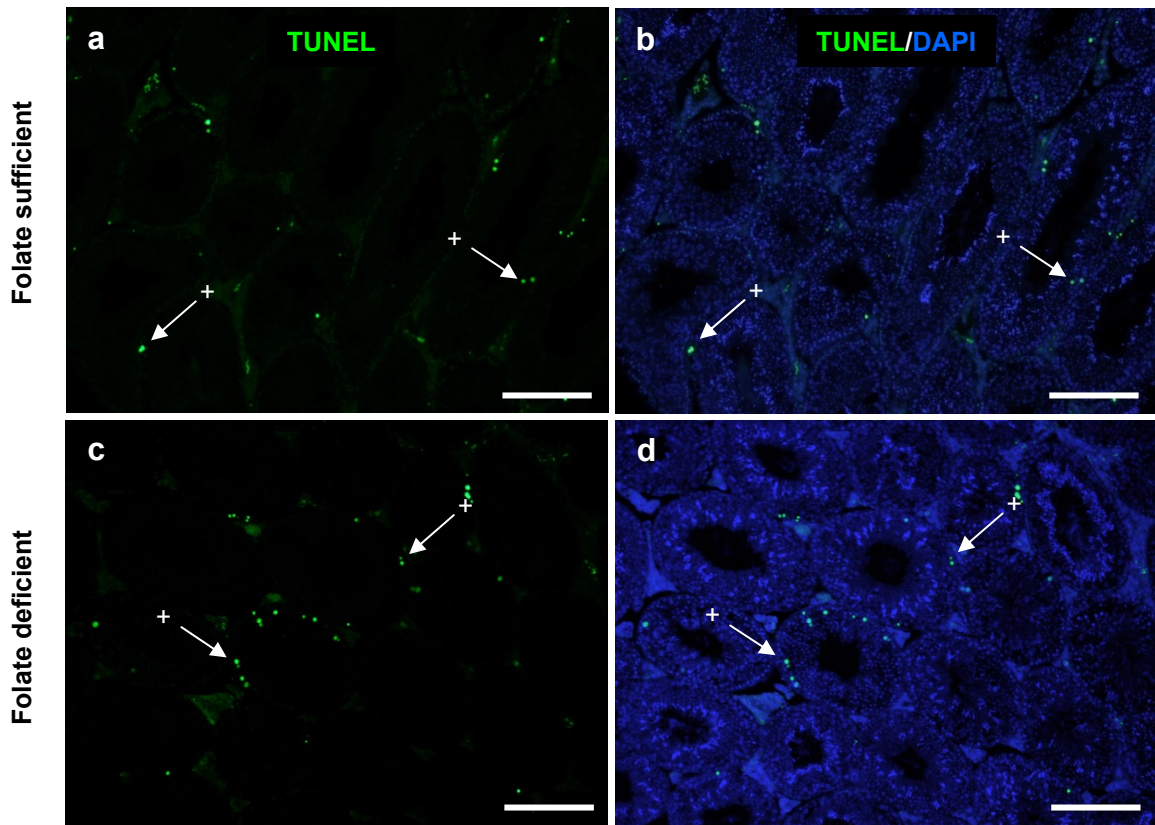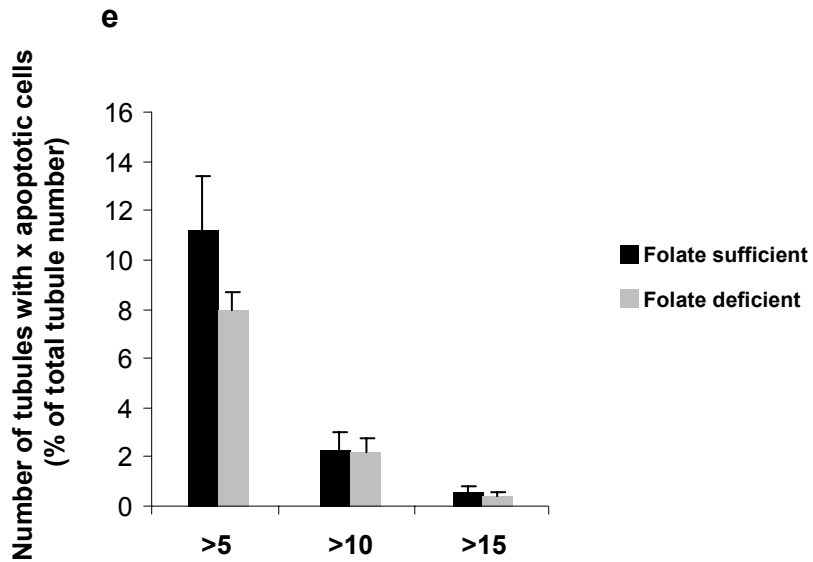

**Supplementary Figure S3. Germ cell apoptosis rate is not altered by folate deficiency.**

Testis cross sections from folate sufficient (FS) (a,b) and folate deficient (FD) (c,d) mice were submitted to a TUNEL assay to detect apoptotic cells (+, green); nuclei DNA was stained with DAPI (blue). (e) the number of apoptotic cells per tubule was assessed and classified in three categories (>5, >10 and >15). Means  $\pm$  SEM of 7 determinations are shown. Bars represent 100 $\mu$ m.

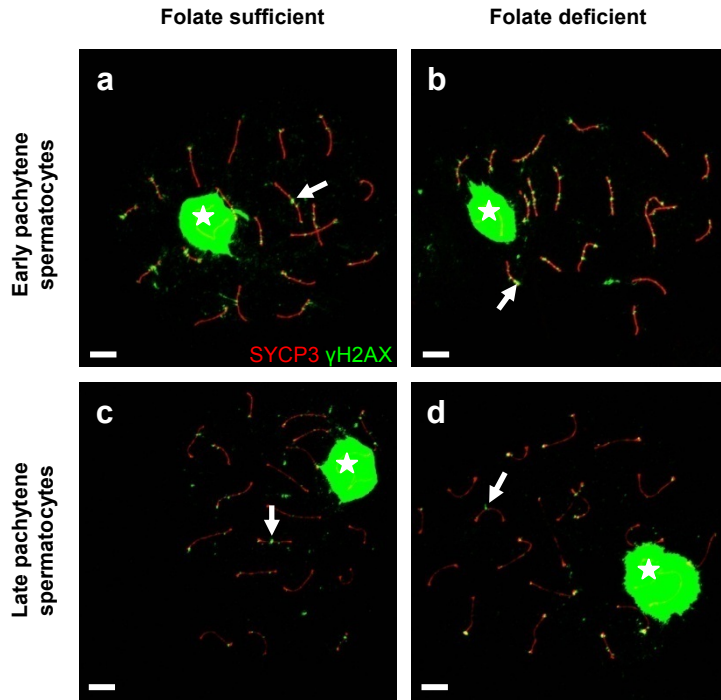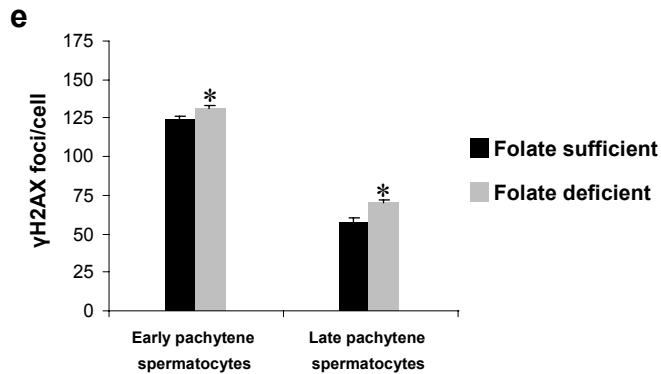

**Supplementary Figure S4. Folate deficiency is associated with increased DNA double strand breaks (DSBs) in pachytene spermatocytes.**

(a-d) Co-immunofluorescent staining for SYCP3 (red) and  $\gamma$ H2AX (green) on isolated pachytene spermatocytes. SYCP3 is a marker of the meiotic chromosomal axis and  $\gamma$ H2AX is a marker of DNA DSBs. Arrows indicate DNA DSBs, and stars indicate the sex body. (e) The values shown are means  $\pm$  SEM. Statistical comparison between FS (n=3) and FD (n=3) mice was done using a subsample model test (\*p<0.05). Bars represent 10 $\mu$ m.

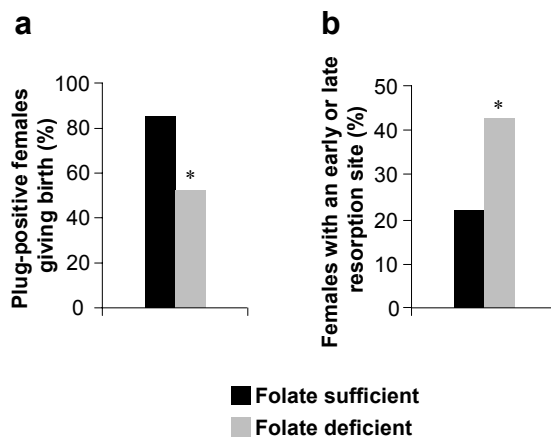

**Supplementary Figure S5. Paternal folate deficiency compromises fertility and adversely affected pregnancy outcomes.**

(a) Folate sufficient (FS) or folate deficient (FD) males were bred to CD-1 females and their litters examined at 18.5 days post conception. The pregnancy rate of females mated with a FD male decreased in comparison to an FS mating. (b), Females mated with a FD male had increased pregnancy resorption rates. Early resorption was identified by the presence of early-remnants of a placenta and no obvious signs of a fetus whereas late resorption was characterized by visible remnants of a dead fetus. All data were calculated and shown on a per male basis; \* $p < 0.05$  by Fisher's exact test (a) and Chi-square test (b). Means of 20 (FS) and 21 (FD) determinations are shown.



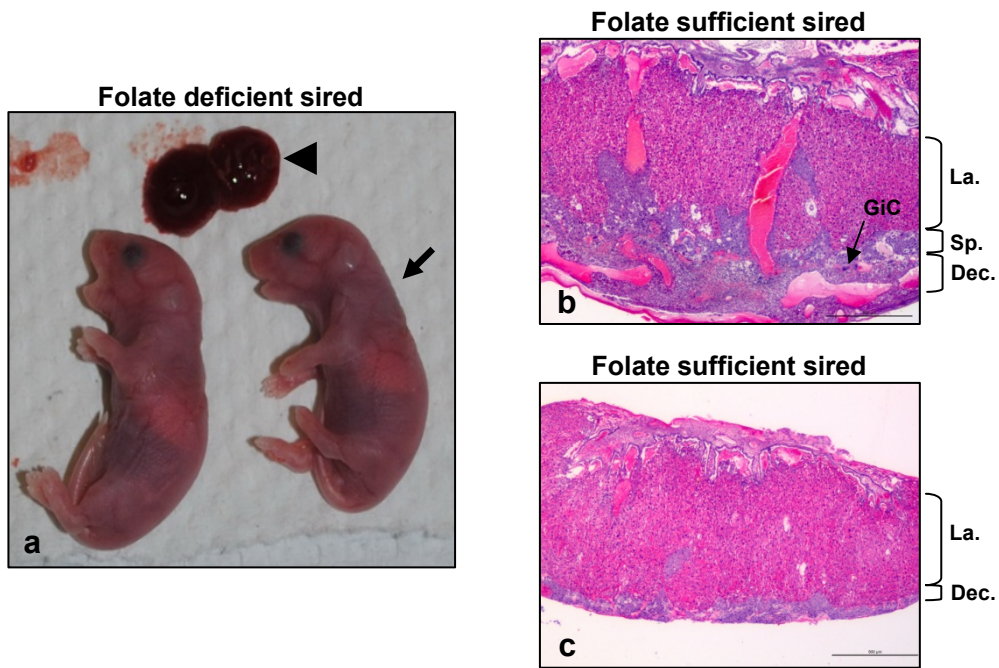

**Supplementary Figure S6. Placental abnormalities in pregnancies sired by a folate deficient father.** (a) The 18.5 day-post-conception (dpc) fetuses shared a fused placenta (arrowhead). The arrow indicates the runt fetus. Example of a 18.5dpc placenta cross sections from a fetus sired by a folate sufficient (FS) (b) and one by a folate deficient (FD) father (c). Placenta cross-sections stained with haematoxylin and eosin. The giant cell (GiC) layer indicated by an arrow in an FS-sired placenta was absent in the placenta of the fetus sired by an FD male. The spongiotrophoblast (Sp.), situated in-between the labyrinth (La.) and the maternal decidua (Dec.), was abnormally thin. Bars represent 500µm.

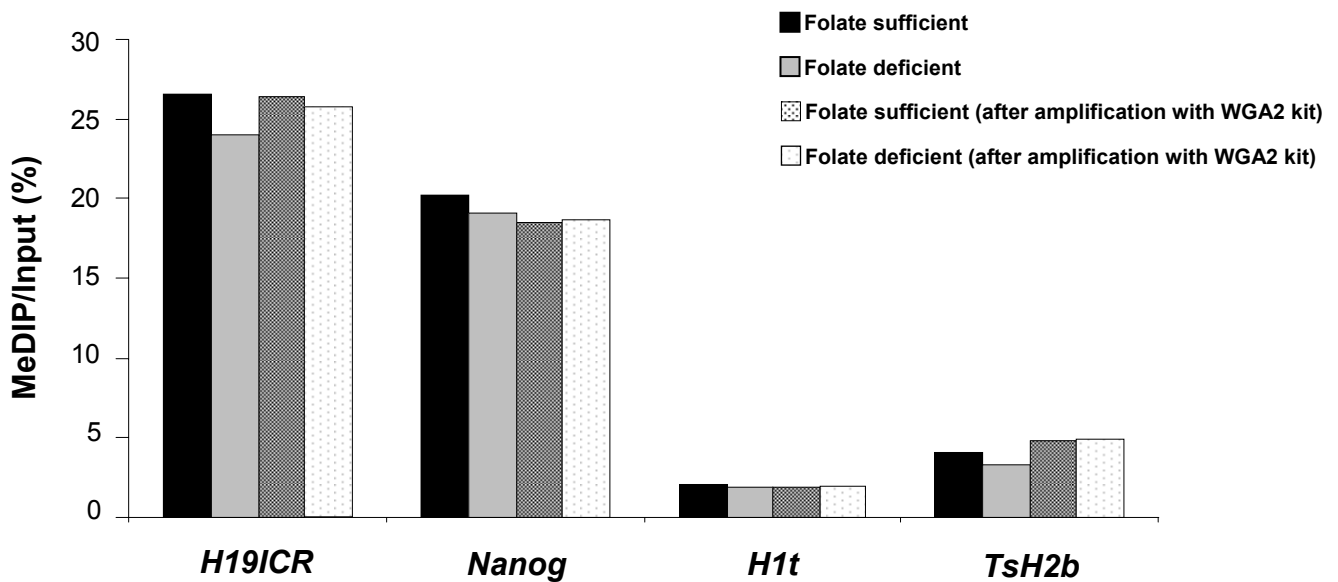

**Supplementary Figure S7. Confirmation of sperm sample purity and enrichment of hypermethylated regions in the sperm MeDIP fractions.** Real-time PCR was carried out on MeDIP and input samples of sperm DNA from folate sufficient (FS) or folate deficient (FD) males before and after amplification with a WGA2 kit. Regions amplified are known to be hypermethylated (*H19ICR*, *Nanog* promoter) or hypomethylated (*H1t*, *TsH2b* promoters) in sperm. Data are expressed as a ratio of DNA immunoprecipitated to input DNA. Means of 2 determinations are shown.

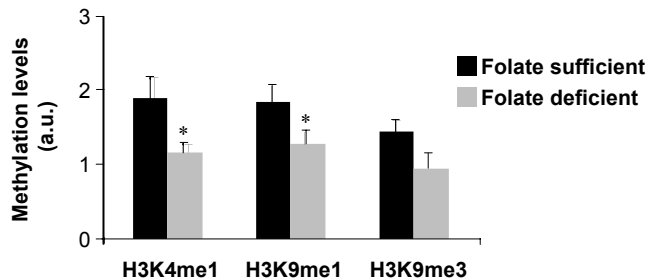

**Supplementary Figure S8. Folate deficiency reduces sperm histone H3 lysine 4 (H3K4) and lysine 9 (K9) methylation.**

Western blot analyses for levels of histone H3K4 mono-methylation (m1), H3K9m1 and H3K9 tri-methylation (m3) in sperm. Sperm from FD males had reduced H3K4me1, and K9me1 and H3K9me3 compared with FS sperm (\* $p < 0.05$  by Student *t*-test) (FS,  $n=7$ ; FD,  $n=7$ ). H3K9me3 was also decreased in FD versus FS sperm ( $p < 0.06$  by Student *t*-test) (FS,  $n=6$ ; FD,  $n=6$ ). Data are presented as the ratio of methylation over  $\beta$ -actin. The values are means  $\pm$  SEM.



### H3K4me1

### H3K9me1

### H3K9me3

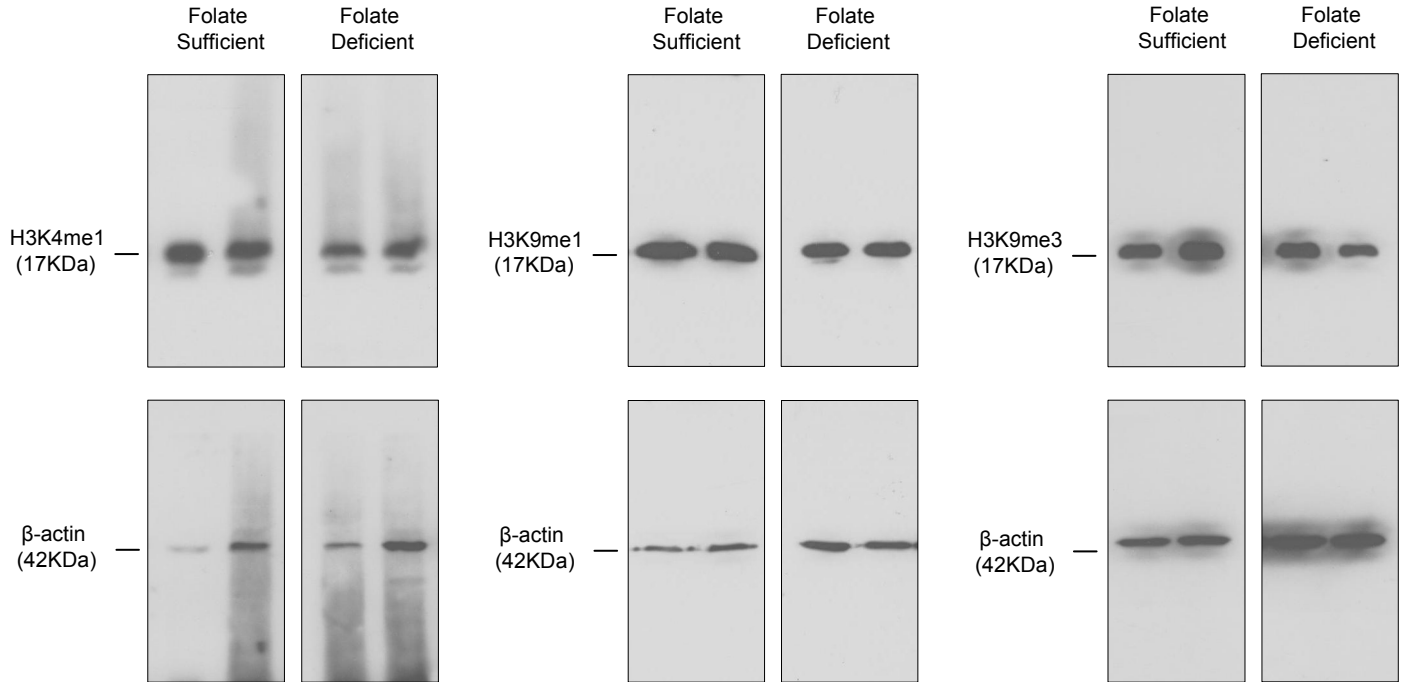

**Supplementary Figure S9. Folate deficiency reduces sperm histone H3 lysine 4 (H3K4) and lysine 9 (K9) methylation.**

Western blot analyses for levels of histone H3K4 mono-methylation (m1), H3K9m1 and H3K9 tri-methylation (m3) in sperm.  $\beta$ -actin is used as a control. Representative bands from sperm extracts from 2 Folate Sufficient and 2 Folate Deficient males are shown.

**Supplementary Table S1.** No effects of folate deficiency on pubertal and adult testis, epididymides and body weight.

| <i>Diet</i> | <i>Age</i> | <i>Mean body weight (g)</i> | <i>Mean testes weight (mg)</i> | <i>Relative testes weight (%)</i> | <i>Mean epididymides weight (mg)</i> | <i>Relative epididymides weight (%)</i> |
|-------------|------------|-----------------------------|--------------------------------|-----------------------------------|--------------------------------------|-----------------------------------------|
| FS          | 2 months   | 19.74±0.91                  | 64.12±3.04                     | 0.33±0.01                         | 33.38±1.88                           | 0.17±0.01                               |
| FD          | 2 months   | 21.06±0.50                  | 63.67±1.70                     | 0.30±0.01                         | 32.85±2.80                           | 0.15±0.01                               |
| FS          | 4 months   | 28.82±0.48                  | 82.04±1.41                     | 0.29±0.01                         | 37.15±1.38                           | 0.13±0.01                               |
| FD          | 4 months   | 29.11±0.53                  | 82.51±1.41                     | 0.29±0.01                         | 39.11±1.45                           | 0.14±0.01                               |

2-mo: (Folate sufficient (FS), n=14; Folate deficient (FD), n=12)

4-mo: (FS, n=40; FD, n=37)

Means ±SEM are shown.

**Supplementary Table S2.** Increased abnormalities in fetuses sired by males exposed to a folate sufficient (FS) or deficient (FD) diet assessed at day 18.5 of gestation.

| <i>Diet of the father</i> | <i>Embryo weight</i> | <i>Crown-rump length</i> | <i>Placenta weight</i> | <i>Placenta width</i> | <i>Embryo malformations</i> | <i>Placenta malformations</i>        |
|---------------------------|----------------------|--------------------------|------------------------|-----------------------|-----------------------------|--------------------------------------|
| FS                        | 1.38±0.02            | 24.17±0.20               | 0.088<br>±0.005        | 7.69±0.12             | 3/285                       | Small:<br>7/ 126                     |
| FD                        | 1.40±0.02            | 24.18±0.15               | 0.087<br>±0.004        | 7.54±0.09             | 14/328*                     | Small:<br>9/ 199<br>Fused:<br>2/ 199 |

Means ±SEM of 17 to 32 (FS) and 16 to 35 (FD) determinations are shown.

\*  $p < 0.05$  by Fisher's exact test.

**Supplementary Table S3.** Post-implantation loss increased in pregnancies sired by folate deficient males in comparison to folate sufficient sired pregnancies as assessed at day 18.5 of gestation.

| <i>Diet of the male</i> | <i>Number of corpora lutea</i> | <i>Number of implantation sites</i> | <i>Pre-implantation loss (%)</i> | <i>Post-implantation loss (%)</i> |
|-------------------------|--------------------------------|-------------------------------------|----------------------------------|-----------------------------------|
| FS                      | 13.16±0.56                     | 10.92±0.48                          | 15.90±3.41                       | 2.71±0.82                         |
| FD                      | 13.26±0.39                     | 11.74±0.47                          | 10.95±3.13                       | 4.42±1.04 *                       |

Means ±SEM of 32 (FS) and 35 (FD) determinations are shown.

\*  $p < 0.05$  by Kolmogorov-Smirnov test.

**Supplementary Table S4.** List of differentially methylated regions identified by MeDIP-array in the sperm of mice fed a folate deficient diet versus mice on a folate sufficient diet).

| Location of the region differentially methylated | Closest gene          | Distance from the TSS (in bp) | Function and associated abnormalities/disease                                                                                                                 | q value |
|--------------------------------------------------|-----------------------|-------------------------------|---------------------------------------------------------------------------------------------------------------------------------------------------------------|---------|
| chr10:73279052-73279112                          | <b><i>Pcdh15</i></b>  | 5549                          | protocadherin 15 Gene, mutation associated with deaf-blindness                                                                                                | 0.04    |
| chr10:80290089-80290138                          | <b><i>Oaz1</i></b>    | 712                           | ornithine decarboxylase antizyme 1 Gene, polymorphism associated with coronary heart disease                                                                  | 0.06    |
| chr10:99958079-99958129                          | <b><i>Cep290</i></b>  | 7163                          | centrosomal protein 290 Gene, mutations affect multiple organ systems, most commonly the brain and spinal cord (central nervous system), retina, and kidneys. | 0.07    |
| chr11:44334824-44334879                          | <b><i>Rnf145</i></b>  | 1044                          | ring finger protein 145 Gene, Zinc ion binding                                                                                                                | 0.08    |
| chr12:34108450-34108500                          | <b><i>Twistnb</i></b> | -6034                         | TWIST neighbor Gene, transcription factor associated with craniofacial defects and skeletal defects of limbs                                                  | 0.08    |
| chr13:67557465-67557522                          | <b><i>Zfp874</i></b>  | -7075                         | zinc finger protein 874 Gene                                                                                                                                  | 0.09    |
| chr15:78746099-78746148                          | <b><i>Pdxp</i></b>    | 1736                          | pyridoxal (pyridoxine, vitamin B6) phosphatase Gene, metabolism and signal transduction                                                                       | 0.08    |
| chr15:91479170-91479223                          | <b><i>Lrrk2</i></b>   | -24410                        | leucine-rich repeat kinase 2 Gene, signalling implicated in Parkinson disease                                                                                 | 0.08    |
| chr15:91280012-91280068                          | <b><i>Slc2a13</i></b> | -37392                        | solute carrier family 2 , member 13 Gene, transmembrane transport in brain involved in glucose methabolism                                                    | 0.05    |

|                         |                      |         |                                                                                                                                                      |      |
|-------------------------|----------------------|---------|------------------------------------------------------------------------------------------------------------------------------------------------------|------|
| chr16:78384018-78384080 | <b>Btg3</b>          | -6612   | B-cell translocation gene 3<br>Gene, target of P53,<br>candidate tumor suppressor                                                                    | 0.1  |
| chr17:22491647-22491696 | <b>6330416L07Rik</b> | 6663    | RIKEN cDNA 6330416L07<br>Gene, predicted functions<br>are nucleic acid and metal<br>ion binding, gene<br>regulation                                  | 0.07 |
| chr17:23618886-23618938 | <b>AC154753.1</b>    | 39766   | function unknown                                                                                                                                     | 0.05 |
| chr17:39981534-39981583 | <b>mmu-mir-715</b>   | 477     | mmu-mir-715, non-coding<br>RNA post-transcriptional<br>regulation                                                                                    | 0.09 |
| chr17:39982267-39982316 | <b>mmu-mir-715</b>   | 1210    | mmu-mir-715, non-coding<br>RNA post-transcriptional<br>regulation                                                                                    | 0.06 |
| chr17:39982172-39982221 | <b>mmu-mir-715</b>   | 1115    | mmu-mir-715, non-coding<br>RNA post-transcriptional<br>regulation                                                                                    | 0.06 |
| chr17:39981644-39981693 | <b>mmu-mir-715</b>   | 587     | mmu-mir-715, non-coding<br>RNA post-transcriptional<br>regulation                                                                                    | 0.06 |
| chr17:39981755-39981804 | <b>mmu-mir-715</b>   | 698     | mmu-mir-715, non-coding<br>RNA post-transcriptional<br>regulation                                                                                    | 0.06 |
| chr17:40384619-40384675 | <b>Crisp3</b>        | -5410   | cysteine-rich secretory<br>protein 3 Gene, epithelial<br>cell expression, exocrine<br>functions, upregulated in<br>prostate and pancreatic<br>cancer | 0.07 |
| chr17:92154652-92154706 | <b>SNORA17</b>       | 57281   | Small nucleolar RNA<br>SNORA17, RNA<br>biogenesis                                                                                                    | 0.08 |
| chr17:92324177-92324232 | <b>SNORA17</b>       | -112244 | Small nucleolar RNA<br>SNORA17, RNA<br>biogenesis                                                                                                    | 0.1  |
| chr17:92242294-92242352 | <b>SNORA17</b>       | -30363  | Small nucleolar RNA<br>SNORA17, RNA<br>biogenesis                                                                                                    | 0.05 |
| chr17:92242219-92242278 | <b>SNORA17</b>       | -30288  | Small nucleolar RNA<br>SNORA17, RNA<br>biogenesis                                                                                                    | 0.05 |
| chr18:17154258-17154317 | <b>AC125166.1</b>    | -23273  | function unknown                                                                                                                                     | 0.08 |

|                          |                      |       |                                                                                                                                                         |      |
|--------------------------|----------------------|-------|---------------------------------------------------------------------------------------------------------------------------------------------------------|------|
| chr18:25320261-25320310  | <b>5730494M16Rik</b> | 6846  | RIKEN cDNA<br>5730494M16 gene, high<br>expression in testis,<br>predicted function in<br>cytoskeleton                                                   | 0.05 |
| chr19:13304457-13304506  | <b>Olf1463</b>       | -4261 | olfactory receptor 1463<br>Gene, G protein-mediated<br>transduction of odorant<br>signals                                                               | 0.07 |
| chr1:161163423-161163480 | <b>Rfwd2</b>         | 994   | ring finger and WD repeat<br>domain 2 Gene, p53<br>signalling pathway,<br>over-expressed in breast<br>and ovarian cancer                                | 0.05 |
| chr1:90130698-90130747   | <b>Heatr7b1</b>      | -3961 | HEAT repeat containing<br>7B1 Gene, function<br>unknown                                                                                                 | 0.07 |
| chr2:126325205-126325258 | <b>Atp8b4</b>        | 352   | ATPase, class I, type 8B,<br>member 4 Gene, predicted<br>function is metabolism                                                                         | 0.1  |
| chr2:164151125-164151176 | <b>AL590429.1</b>    | 4253  | function unknown                                                                                                                                        | 0.1  |
| chr2:57910117-57910178   | <b>Ermn</b>          | -4872 | ermin, ERM-like protein<br>Gene, cytoskeleton<br>organization and central<br>nervous system<br>development                                              | 0.05 |
| chr2:85433263-85433319   | <b>Olf998</b>        | 2592  | olfactory receptor 998<br>Gene, transduction of<br>odorant signals                                                                                      | 0.05 |
| chr2:89477720-89477773   | <b>Olf1249</b>       | -6693 | olfactory receptor 1249<br>Gene, transduction of<br>odorant signals                                                                                     | 0.05 |
| chr4:110072703-110072761 | <b>Agbl4</b>         | 2336  | ATP/GTP binding<br>protein-like 4 Gene,<br>metallocarboxypeptidase<br>associated with Coeliac<br>disease                                                | 0.05 |
| chr4:111590106-111590157 | <b>Skint8</b>        | -1866 | selection and upkeep of<br>intraepithelial T cells 8<br>Gene, may act by<br>engaging a cell surface<br>molecule on immature<br>T-cells in the embryonic | 0.07 |



|                          |                      |        |                                                                                                                       |      |
|--------------------------|----------------------|--------|-----------------------------------------------------------------------------------------------------------------------|------|
|                          |                      |        | thymus                                                                                                                |      |
| chr4:40188438-40188495   | <b>Ddx58</b>         | -1605  | DEAD (Asp-Glu-Ala-Asp) box polypeptide 58 Gene, probable ATP-dependent RNA helicase, innate anti-viral immune defense | 0.1  |
| chr5:108254422-108254476 | <b>1700013N18Rik</b> | -4823  | RIKEN cDNA 1700013N18 gene, proposed function in protein modification                                                 | 0.05 |
| chr5:135035053-135035102 | <b>Gm52</b>          | 886    | predicted gene 52 Gene, function unknown                                                                              | 0.05 |
| chr6:123808404-123808460 | <b>Vmn2r25</b>       | -5224  | vomeronasal 2, receptor 25 Gene, signal transduction                                                                  | 0.08 |
| chr6:28223524-28223582   | <b>Zfp800</b>        | -11621 | zinc finger protein 800 Gene, predicted function is nucleic acid binding                                              | 0.08 |
| chr6:29133530-29133587   | <b>Prrt4</b>         | -3974  | proline-rich transmembrane protein 4 Gene, function unknown                                                           | 0.05 |
| chr6:57647426-57647482   | <b>Lancl2</b>        | -5141  | bacterial lantibiotic synthetase component C-like 2 Gene, testis-specific G- protein coupled receptor                 | 0.09 |
| chr6:67488830-67488880   | <b>Tacstd2</b>       | -3155  | tumor-associated calcium signal transducer 2 Gene, cell proliferation, associated with cancer                         | 0.03 |
| chr6:67488927-67488979   | <b>Tacstd2</b>       | -3253  | tumor-associated calcium signal transducer 2 Gene, cell proliferation, associated with cancer                         | 0.03 |
| chr6:67489929-67489981   | <b>Tacstd2</b>       | -4255  | tumor-associated calcium signal transducer 2 Gene, cell proliferation, associated with cancer                         | 0.05 |
| chr6:91107416-91107465   | <b>Hdac11</b>        | 49     | histone deacetylase 11 Gene, regulation of gene expression expressed in brain, testis and cancer                      | 0.07 |

|                          |                             |        |                                                                                          |      |
|--------------------------|-----------------------------|--------|------------------------------------------------------------------------------------------|------|
| chr7:113980076-113980128 | <b><i>Olf703</i></b>        | -8025  | olfactory receptor 703<br>Gene, transduction of<br>odorant signals                       | 0.09 |
| chr7:115126908-115126966 | <b><i>Olf477</i></b>        | -6944  | olfactory receptor 477<br>Gene, transduction of<br>odorant signals                       | 0.05 |
| chr7:115127023-115127072 | <b><i>Olf477</i></b>        | -6834  | olfactory receptor 477<br>Gene, transduction of<br>odorant signals                       | 0.05 |
| chr7:29322310-29322366   | <b><i>AC136456.1</i></b>    | 2547   | function unknown                                                                         | 0.06 |
| chr7:29593309-29593358   | <b><i>Hnrnp1</i></b>        | -2623  | heterogeneous nuclear<br>ribonucleoprotein L Gene,<br>regulation of mRNA<br>splicing     | 0.1  |
| chr8:102661089-102661144 | <b><i>AC122514.2</i></b>    | 77100  | function unknown                                                                         | 0.09 |
| chr8:116162357-116162406 | <b><i>Mon1b</i></b>         | 2682   | MON1 homolog b (yeast)<br>Gene                                                           | 0.1  |
| chr9:39022393-39022446   | <b><i>Olf944</i></b>        | -2525  | olfactory receptor 944<br>Gene, transduction of<br>odorant signals                       | 0.09 |
| chr9:39048473-39048533   | <b><i>Olf144</i></b>        | -2487  | olfactory receptor 1537,<br>pseudogene 1,<br>transduction of odorant<br>signals          | 0.05 |
| chr9:39771133-39771186   | <b><i>Olf976</i></b>        | -6605  | olfactory receptor 976<br>Gene, transduction of<br>odorant signals                       | 0.09 |
| chr9:46154025-46154074   | <b><i>4931429L15Rik</i></b> | -25980 | RIKEN cDNA 4931429L15<br>gene, function unknown                                          | 0.08 |
| chrX:101872497-101872550 | <b><i>Zdhhc15</i></b>       | -6120  | zinc finger, DHHC domain<br>containing 15 Gene,<br>associated with mental<br>retardation | 0.07 |
| chr6:17274409-17274468   | <b><i>*Cav1</i></b>         | 16715  | Caveolin 1, cell signal<br>progression                                                   | 0.18 |
| chr14:45844046-45844097  | <b><i>*Txndc16</i></b>      | -4068  | Thioredoxin<br>Domain-Containing 16,<br>cell redox homeostasis                           | 0.2  |

The q-value is an adjusted p-value indicating false discovery rate (FDR) calculated by Wilcoxon rank sum-test. For all genes with a q-value < 0.1, 10% are expected to be false positives.

\**Cav 1* and \**Txndc16* were identified when relaxing the FDR from 0.1 to 0.25.

**Supplementary Table S5.** List of primers used for the MeDIP-qPCR, gene expression and pyrosequencing arrays.

| <b>MeDIP-qPCR primers</b> |         |                         |
|---------------------------|---------|-------------------------|
| Gene promoter region      | Primers | sequence                |
| <b><i>H19 ICR</i></b>     | Forward | GCCTCAGTGGTCGATATGGTTT  |
|                           | Reverse | AAAGGGACCCCTCCAGAA      |
| <b><i>Nanog</i></b>       | Forward | GGACTGATCGGCAAACCTTTGA  |
|                           | Reverse | TGGTCCCAAACCTCCTGATCTTC |
| <b><i>H1t</i></b>         | Forward | ACGTAGGTGCCATGGGTAAGA   |
|                           | Reverse | CCCGCCTGAATCTCAAGAGA    |
| <b><i>TsH2B</i></b>       | Forward | CCCCGCTTCTCAACCTCAA     |
|                           | Reverse | CAACGTCTCAAAACAGTTCCAAC |

| <b>Gene expression primers</b> |         |                             |
|--------------------------------|---------|-----------------------------|
| Gene                           | Primers | sequence                    |
| <b><i>Cav1</i></b>             | Forward | CGCGACCCCAAGCATCT           |
|                                | Reverse | CTGCAATCACATCTTCAAAGTCAA    |
| <b><i>Cav2</i></b>             | Forward | GAGTCACGACCGGGATCCT         |
|                                | Reverse | GATCCTCGAAGCCTAGCTTGAG      |
| <b><i>Txndc16</i></b>          | Forward | CACGCTAATGTGGCCTTCAGA       |
|                                | Reverse | CAACATCATTCAACACCAGAACTC    |
| <b><i>Ddx58</i></b>            | Forward | GAGACAGAGAAGCTAGCCAAGGA     |
|                                | Reverse | GTGCCGAATTCTCTGTTTTGAAT     |
| <b><i>Parp1</i></b>            | Forward | GCCGAAAGGAATGGGTAAC         |
|                                | Reverse | CCTGTTTTTTGACCTTTAACTTCTTGA |

| <b>Pyrosequencing primers</b> |                      |                                |
|-------------------------------|----------------------|--------------------------------|
| Genomic location              | Primers              | Sequence                       |
| <b><i>Cav1-CpG1</i></b>       | Forward              | TAGGGGTTTTTAGGTAAAGTGT         |
|                               | Reverse biotinylated | CTTTCAATTACTACTATACCCTTCCTAATA |
|                               | Sequencing           | ATTTTTGTAGTGAGATAAAAT          |
| <b><i>Cav1-CpG2</i></b>       | Forward biotinylated | ATTAGGAAGGGTATAGTAGTAATTGAAAGA |
|                               | Reverse              | ACCCTTAATCCTATAAAAACTTAATTCCC  |

|                                  |                      |                               |
|----------------------------------|----------------------|-------------------------------|
|                                  | Sequencing           | CCCCAATATAAAAAATACCA          |
| <b><i>Cav1-CpG-rich</i></b>      | Forward              | GTTGTTAGAATTTTGGGGATGTG       |
|                                  | Reverse biotinylated | ATAACTAAAAAAAAACCTCTTAECTATTC |
|                                  | Sequencing           | GGGGATGTGTTTAGAT              |
| <b><i>Txndc16-CpG1</i></b>       | Forward              | TGGAAATGGAGTTATATTTATTTAAAGTG |
|                                  | Reverse biotinylated | CATATTAACATTTTTCTTCCAECTTCTA  |
|                                  | Sequencing           | TTTTATTTGAAGAAGTAATAATAG      |
| <b><i>Txndc16-CpG2</i></b>       | Forward biotinylated | GGGTGTTGGGAATTGAATTT          |
|                                  | Reverse              | ACAAATACCTAACTATTAACCATCTCTC  |
|                                  | Sequencing           | CTATTAAACCATCTCTCCA           |
| <b><i>Txndc16-Cpg-island</i></b> | Forward              | GTGGAGGTTTGGGATATTGAATAAAG    |
|                                  | Reverse biotinylated | TATCTTTCCCTCTCCCTCAACT        |
|                                  | Sequencing           | AAAGGGTGTTTTATTGT             |
